# Supplementary material
Source: JCI journal article supplement (doi:10.1172/jci196505)
Supplement: sd1 [file 1]

**Conflict of interest:**

The CARD trial was funded by Sanofi. OL reports receiving travel support from Consens/Digital Science Press LLC. SG and RW were employees of Epic Sciences at the time this work was done.

KP reports receiving consulting fees from Sanofi. EE reports receiving consulting fees and honoraria from Johnson & Johnson, Pfizer, Astellas, and Bayer.

CS reports receiving consulting fees from Astellas Pharma, AstraZeneca, Bayer, Bristol Myers Squibb/Medarex, Foundation Medicine, Genzyme, Gilead, Merck, MSD, Pfizer, Janssen, Roche, Medscape, UroToday, and Tolmar and honoraria from Merck and Pfizer.

KF reports participating in advisory boards for Amgen, Astellas, AstraZeneca, Bayer, Clovis, Daiichi-Sankyo, Janssen, MSD, Novartis/AAA, Pfizer, Sanofi, Arvinas, CureVac, MacroGenics, and Orion Pharma. CGR and SM are Sanofi employees.

BT's institution has received grants from Bayer and Ferring, and he has received honoraria and consulting fees from Amgen, Astellas, AstraZeneca, Bayer, Ferring, Accord, MSD, Janssen, and Novartis.

AS has been the CI/PI of industry-sponsored clinical trials; reports receiving consulting fees from De Shaw Research, CHARM Therapeutics, Ellipses Pharma, and Droia Ventures; honoraria from Merck, Sharp and Dohme, and Astellas; and travel support from Nurix, Sanofi, and Roche-Genentech.

AS is named as coinventor for patent WO-2022129935-A1, which covers the use of a JMJD6 targeting agent for prostate cancer and participates in an independent safety data monitoring board for the ProBio Trial.

OS reports receiving grants from Amgen, AstraZeneca, Bayer, Johnson & Johnson, and Novartis; consulting fees from Abdera, Actithera, AdvanCell, Alpha9, Amgen, ART BioScience, Astellas Pharma, AstraZeneca, Bayer, Bavarian Nordic, Blue Earth Diagnostics, Bristol Myers Squibb, Clarity Pharmaceuticals, Convergent, Curium, Curdah, EMD Serono, Dendreon Isotopen Technologien, ITM Oncologics, Johnson & Johnson, Lantheus, MacroGenics, Merck, Modex, Myovant Sciences, Norroy, North Star, Novartis, Nucleus Biopharma, Noxopharm, Precede, Progenics, RATIO, Swiss Rockets, Telix Pharmaceuticals, Teneobio, and Wren Laboratories; and honoraria and travel support from Lantheus, NorthStar and Novartis.

OS participates on advisory boards for AstraZeneca, Merck and Pfizer; owns stock in AbbVie, Cardinal Health, Clarity Pharmaceuticals, Curadh, Lilly, Pfizer, Ratio, Telix, and United Health Group; and holds stock options with AdvanCell, Abdera, Actithera, ArtBio, Convergent, and Asta.

RDW reports consulting fees from Sanofi, Astellas, and Merck; honoraria from Astellas and Sanofi; and travel support from Sanofi and Bayer and participates in advisory boards for Merck and Astellas.

JDB has served on advisory boards and received fees from many companies, including Abbvie, Acai Therapeutics, Amgen, Amunix, Astellas, Bayer, Bioxcel Therapeutics, Celcuity, Crescendo, Daiichi, Dark Blue Therapeutics, Duke Street Bio Limited, Dunad Therapeutics, Endeavor Biomedicines, Genentech/Roche, GSK, MacroGenics, Merck Serono, MetaCurUm, Moma, Myricx, Novartis, Nurix Therapeutics, Nuvation Bio,

One-Carbon Therapeutics Inc., Oncternal, Orion, Page Therapeutics, Pfizer, Takeda, Tango Therapeutics, and Tubulis GmbH. He is an employee of the Institute of Cancer Research, which has received funding or other support for his research work from AstraZeneca, Cellcentric, Crescendo, Daiichi, Immunic Therapeutics, MetaCurUm, Myricx, Nurix Therapeutics, Oncternal, Orion, and Sanofi Aventis. The Institute of Cancer Research has a commercial interest in abiraterone, PARP inhibition in DNA repair-defective cancers, and PI3K/AKT pathway inhibitors.

JDB was named as an inventor, with no financial interest, for patent 8,822,438, submitted by Janssen, which covers the use of abiraterone acetate with corticosteroids. He has been the CI/PI of many industry-sponsored clinical trials.

JDB is a National Institute for Health Research (NIHR) Senior Investigator. The views expressed in this article are those of the author(s) and not necessarily those of the NHS, the NIHR, or the Department of Health.

## Supplemental material

Supplemental Figure 1. Sample disposition.

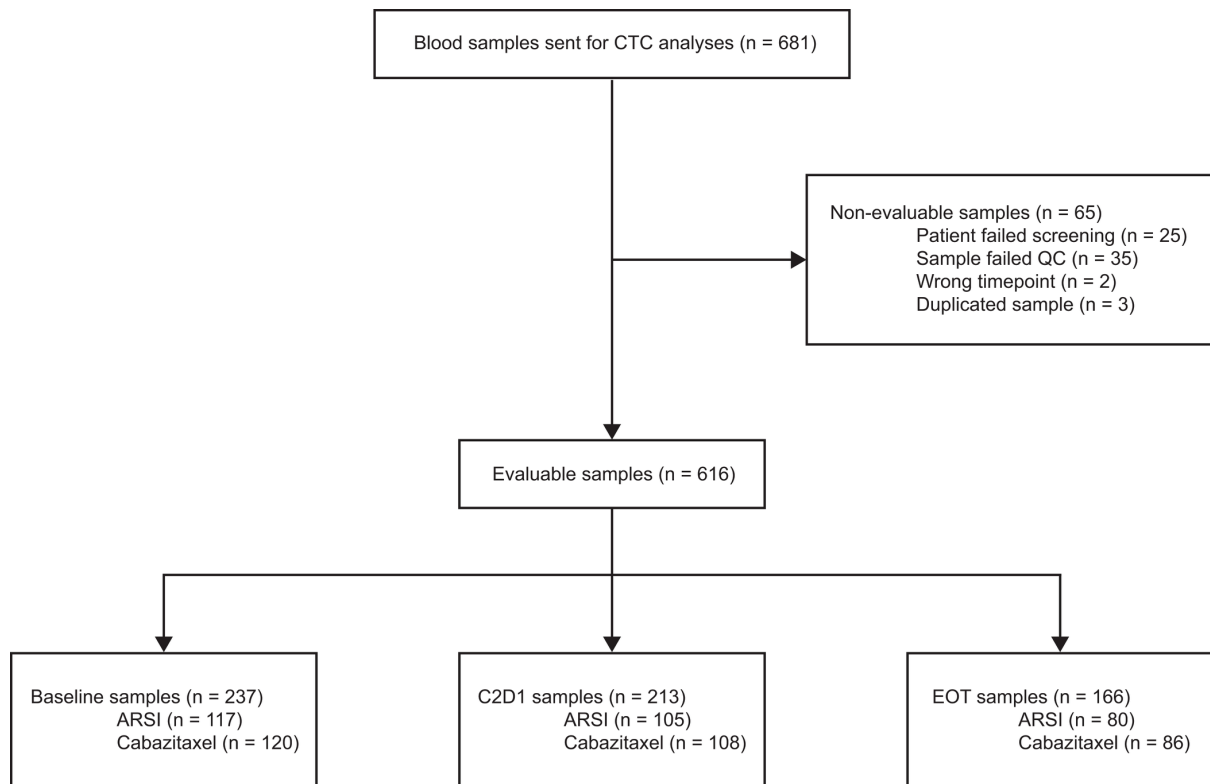

**Supplemental Figure 2. Distribution of CTC (left) and CTC-CIN (right) counts at baseline (red), cycle 2 day 1 (green), and end of treatment (blue). Grey dots represent patients randomized to ARPI and red dots represent patients randomized to cabazitaxel. n = patients with minimum CTC or CTC-CIN count, N = total patients with evaluable samples per timepoint.**

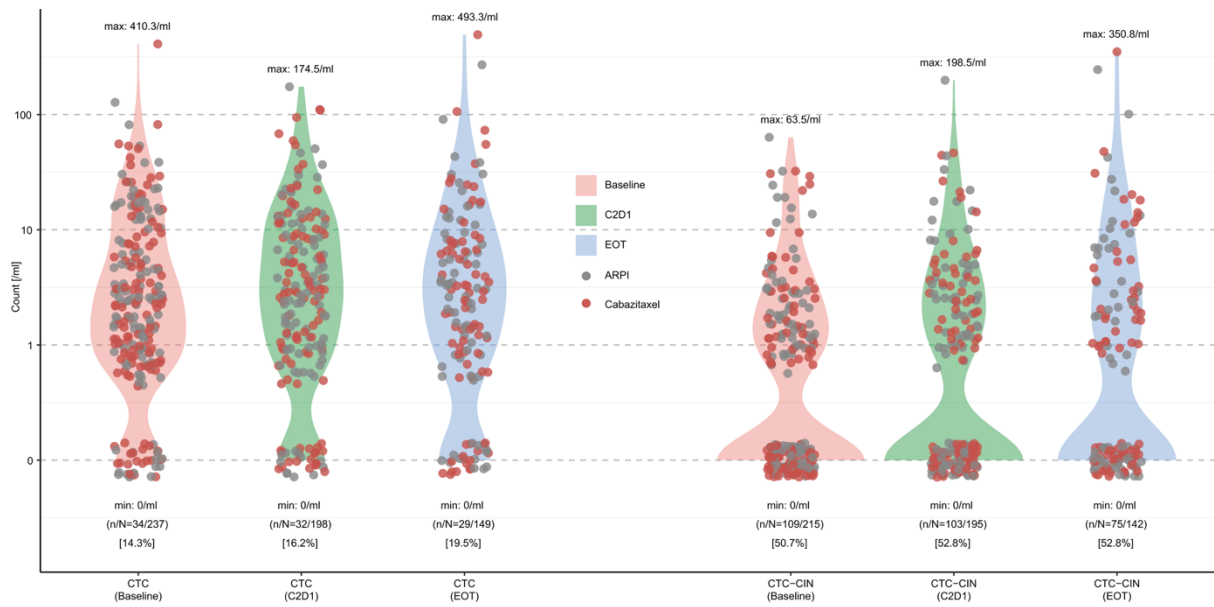

**Supplemental Figure 3. Parametric accelerated failure time (AFT) Weibull models of OS, ibPFS, and time to PSA progression by baseline CTC-CIN count irrespective of treatment arm (left column) and adjusting for treatment arm (right column).**

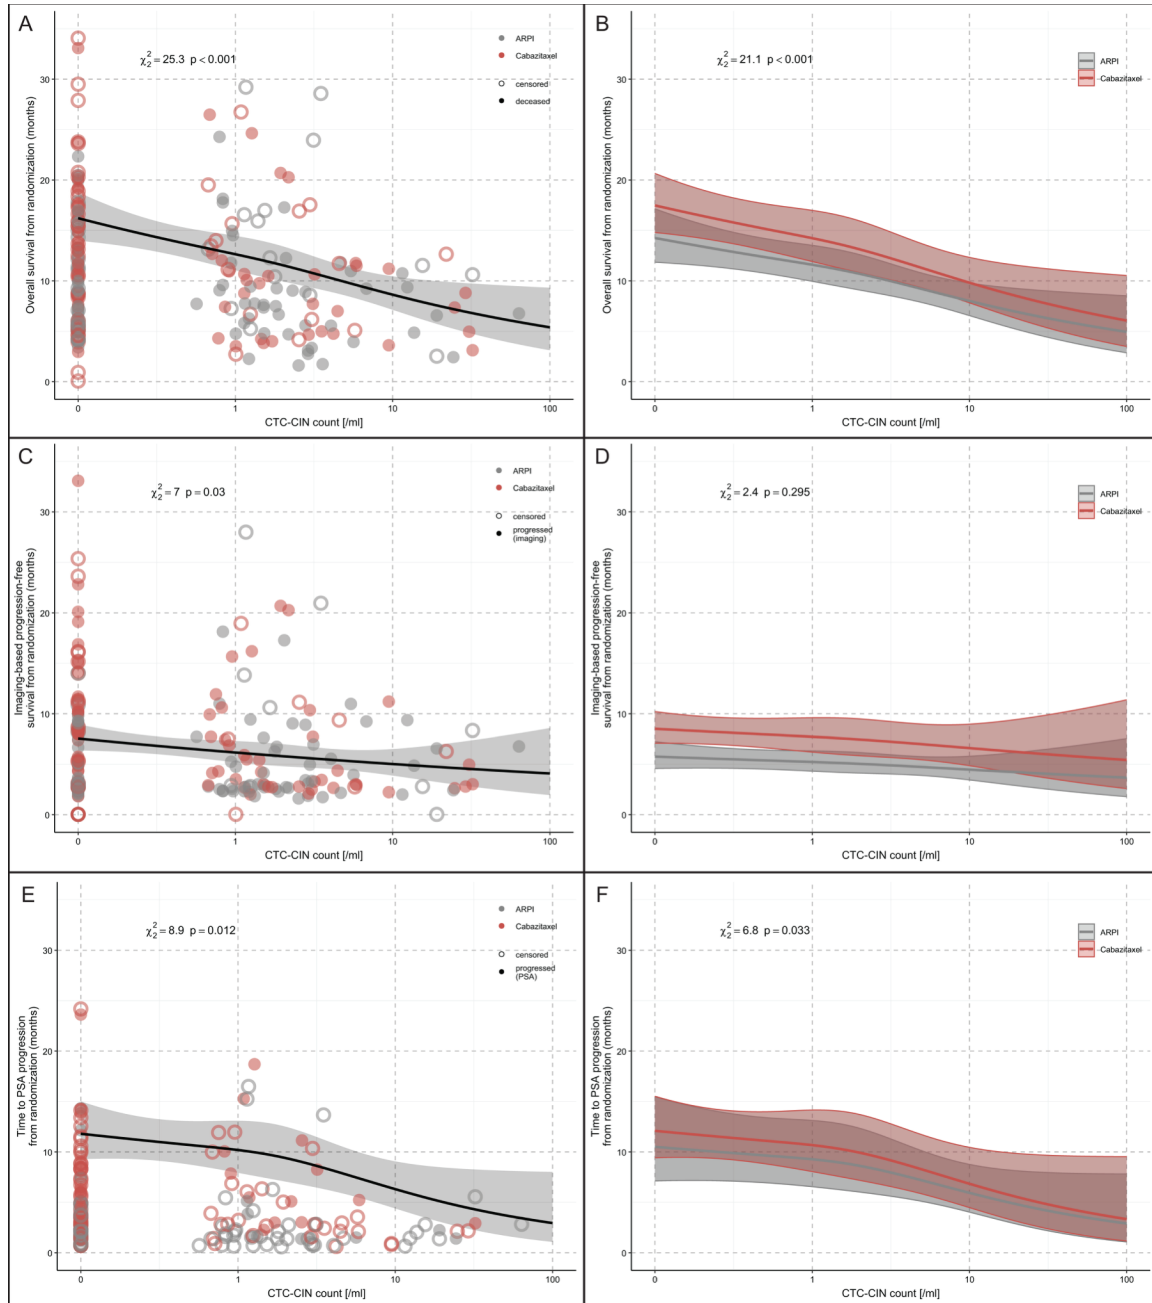

**Supplemental Figure 4. Parametric accelerated failure time (AFT) Weibull models of OS, ibPFS, and time to PSA progression by baseline CTC count irrespective of treatment arm (left column) and adjusting for treatment arm (right column).**

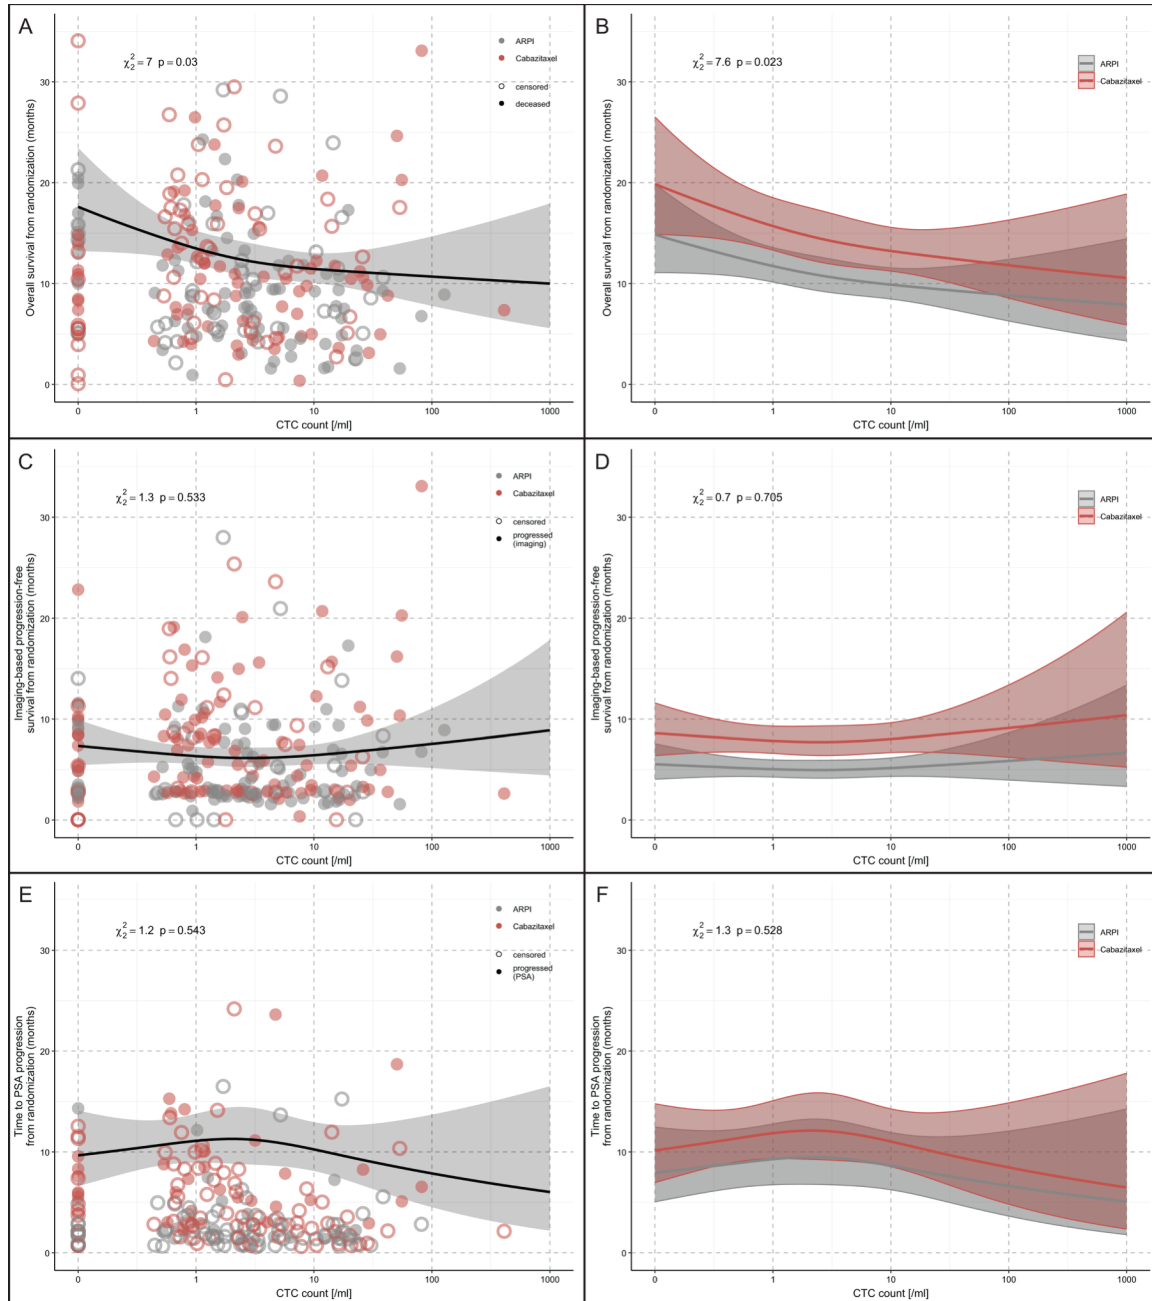



**Supplemental Figure 6. Swimmer plot of duration of PSA response by CTC-CIN count at baseline and treatment arm. Continuous line marks 24 weeks after randomization.**

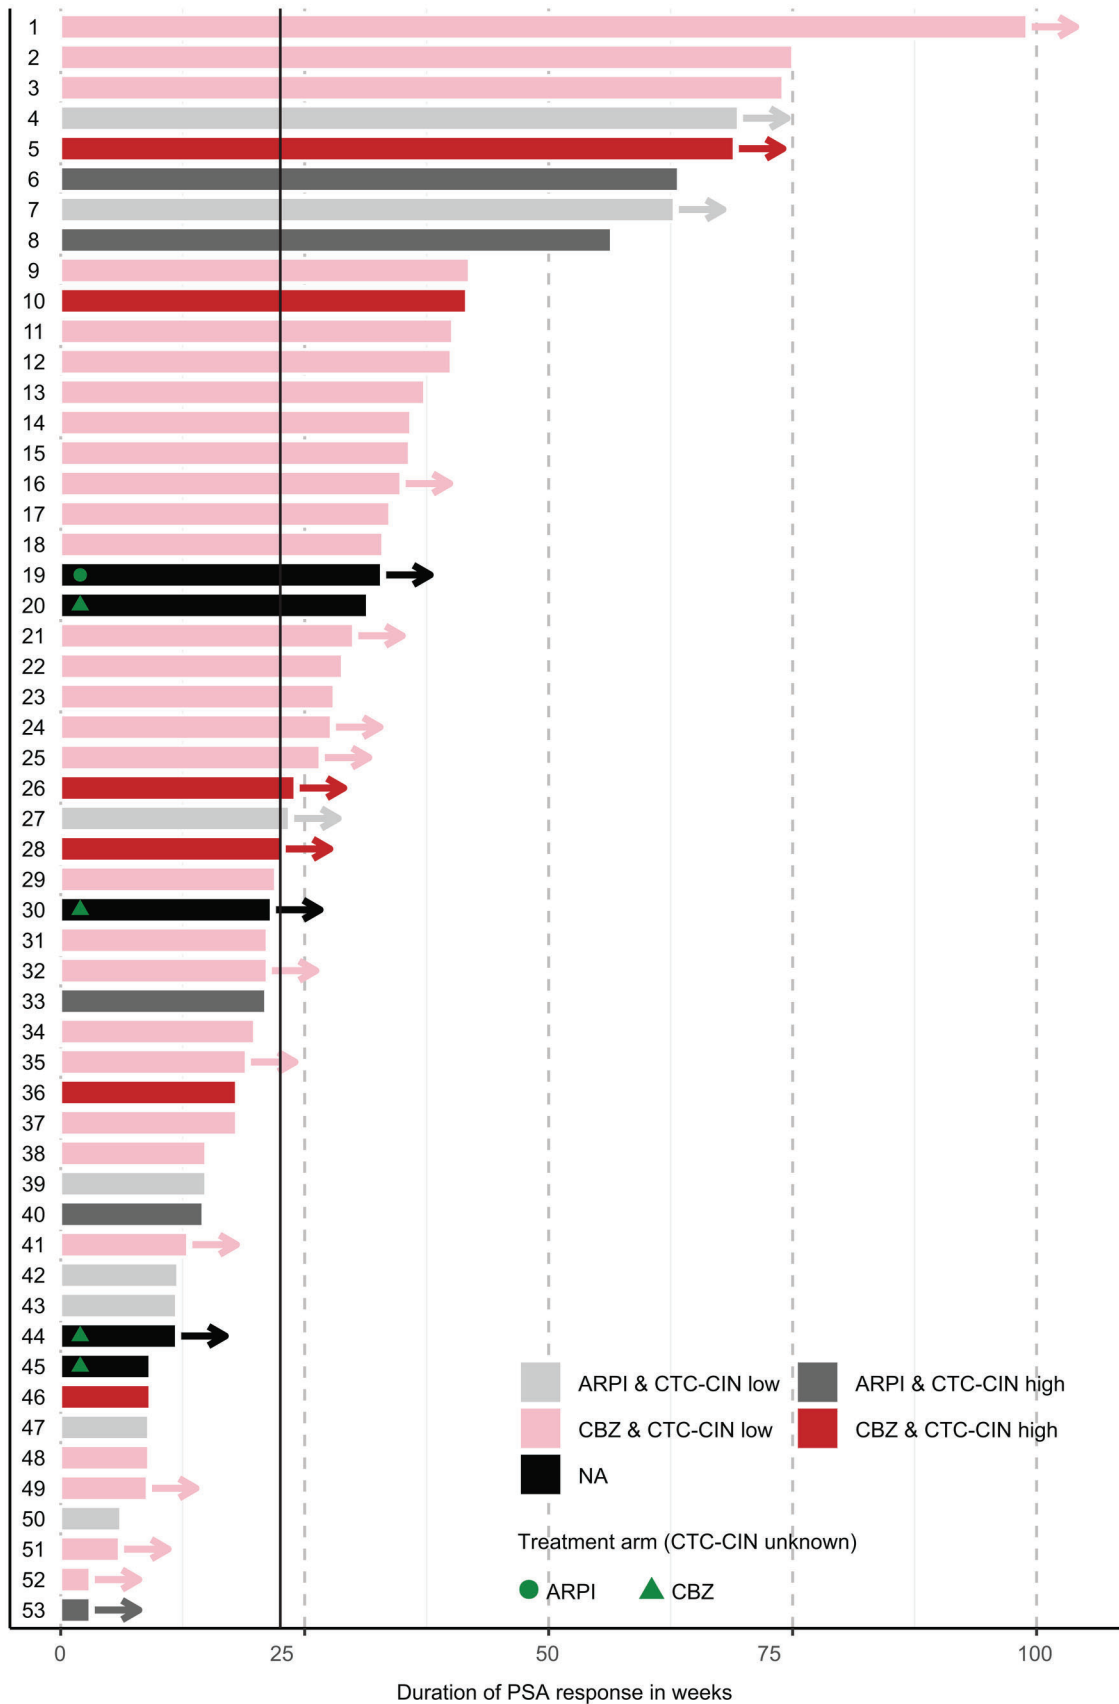

**Supplemental Figure 7. Kaplan-Meier curves of OS from randomization by baseline CTC and CTC-CIN counts (cut-off for CTC, 2/mL; cut-off for CTC-CIN, 1/mL).**

+ CTC low & CTC-CIN low   
 + CTC high & CTC-CIN low   
 + CTC low & CTC-CIN high   
 + CTC high & CTC-CIN high

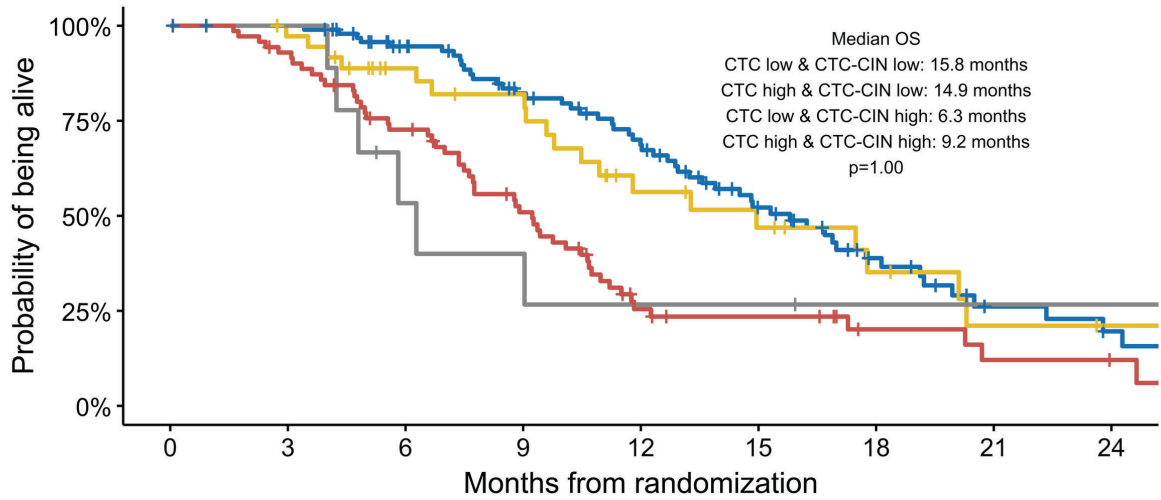

Number at risk (number of events)

|   |        |        |         |         |         |         |         |        |        |
|---|--------|--------|---------|---------|---------|---------|---------|--------|--------|
| ■ | 98 (0) | 96 (0) | 80 (5)  | 63 (15) | 50 (25) | 31 (36) | 17 (43) | 8 (48) | 5 (50) |
| ■ | 37 (0) | 35 (1) | 26 (4)  | 23 (6)  | 13 (13) | 10 (15) | 6 (17)  | 3 (19) | 2 (19) |
| ■ | 9 (0)  | 9 (0)  | 4 (4)   | 3 (5)   | 2 (6)   | 2 (6)   | 1 (6)   | 1 (6)  | 1 (6)  |
| ■ | 71 (0) | 65 (5) | 49 (19) | 32 (33) | 13 (48) | 10 (49) | 5 (50)  | 3 (52) | 2 (52) |
|   | 0      | 3      | 6       | 9       | 12      | 15      | 18      | 21     | 24     |

---

**Supplemental Table 1. Data availability for CTC and CTC-CIN counts by timepoint and treatment arm.**

---

|                         | <b>Baseline</b> | <b>C2D1</b> | <b>EOT</b> |
|-------------------------|-----------------|-------------|------------|
| <b>Both arms</b>        |                 |             |            |
| CTC                     | 237             | 198         | 149        |
| CTC-CIN                 | 215             | 195         | 142        |
| <b>ARPI only</b>        |                 |             |            |
| CTC                     | 117             | 98          | 72         |
| CTC-CIN                 | 106             | 96          | 68         |
| <b>Cabazitaxel only</b> |                 |             |            |
| CTC                     | 120             | 100         | 77         |
| CTC-CIN                 | 109             | 99          | 74         |

---

**Supplemental Table 2. CTC and CTC-CIN counts by timepoint and treatment arm.**

| <b>Characteristic</b>     | <b>N</b> | <b>ARPI, N = 117</b> | <b>Cabazitaxel, N = 120</b> | <b>Overall, N = 237</b> |
|---------------------------|----------|----------------------|-----------------------------|-------------------------|
| <b>CTC (Baseline)</b>     | 237      |                      |                             |                         |
| Median (Q1, Q3)           |          | 2.47 (0.80, 7.56)    | 1.39 (0.57, 6.05)           | 2.03 (0.63, 7.09)       |
| Min, Max                  |          | 0.00, 127.48         | 0.00, 410.17                | 0.00, 410.17            |
| <b>CTC (C2D1)</b>         | 198      |                      |                             |                         |
| Median (Q1, Q3)           |          | 2.57 (0.83, 8.41)    | 2.76 (0.58, 9.31)           | 2.70 (0.76, 8.98)       |
| Min, Max                  |          | 0.00, 174.40         | 0.00, 110.41                | 0.00, 174.40            |
| <b>CTC (EOT)</b>          | 149      |                      |                             |                         |
| Median (Q1, Q3)           |          | 2.52 (0.52, 7.66)    | 2.34 (0.58, 7.14)           | 2.38 (0.55, 7.50)       |
| Min, Max                  |          | 0.00, 270.16         | 0.00, 493.20                | 0.00, 493.20            |
| <b>CTC-CIN (baseline)</b> | 215      |                      |                             |                         |
| Median (Q1, Q3)           |          | 0.73 (0.00, 1.99)    | 0.00 (0.00, 1.32)           | 0.00 (0.00, 1.69)       |
| Min, Max                  |          | 0.00, 63.43          | 0.00, 32.20                 | 0.00, 63.43             |
| <b>CTC-CIN (C2D1)</b>     | 195      |                      |                             |                         |
| Median (Q1, Q3)           |          | 0.68 (0.00, 2.53)    | 0.00 (0.00, 2.27)           | 0.00 (0.00, 2.43)       |
| Min, Max                  |          | 0.00, 198.40         | 0.00, 46.37                 | 0.00, 198.40            |
| <b>CTC-CIN (EOT)</b>      | 142      |                      |                             |                         |
| Median (Q1, Q3)           |          | 0.00 (0.00, 2.95)    | 0.37 (0.00, 2.31)           | 0.00 (0.00, 2.62)       |
| Min, Max                  |          | 0.00, 245.23         | 0.00, 350.72                | 0.00, 350.72            |

**Supplemental Table 3. Baseline characteristics by treatment arm and baseline CTC-CIN count.**

| Characteristic             | N   | ARPI                 |                     |                     | Cabazitaxel |                      |                     |                     |
|----------------------------|-----|----------------------|---------------------|---------------------|-------------|----------------------|---------------------|---------------------|
|                            |     | Overall              | CTC-CIN low         | CTC-CIN high        | N           | Overall              | CTC-CIN low         | CTC-CIN high        |
|                            |     |                      | (< 1/ml)            | (≥ 1/ml)            |             |                      | (< 1/ml)            | (≥ 1/ml)            |
|                            |     | N = 106 <sup>1</sup> | N = 59 <sup>1</sup> | N = 47 <sup>1</sup> |             | N = 109 <sup>1</sup> | N = 76 <sup>1</sup> | N = 33 <sup>1</sup> |
| <b>Age at screening</b>    | 106 |                      |                     |                     | 109         |                      |                     |                     |
| < 65 years                 |     | 28 (26%)             | 17 (29%)            | 11 (23%)            |             | 26 (24%)             | 17 (22%)            | 9 (27%)             |
| 65 - 69 years              |     | 22 (21%)             | 12 (20%)            | 10 (21%)            |             | 28 (26%)             | 17 (22%)            | 11 (33%)            |
| 70 - 74 years              |     | 27 (25%)             | 17 (29%)            | 10 (21%)            |             | 19 (17%)             | 16 (21%)            | 3 (9.1%)            |
| ≥ 75 years                 |     | 29 (27%)             | 13 (22%)            | 16 (34%)            |             | 36 (33%)             | 26 (34%)            | 10 (30%)            |
| <b>ECOG PS</b>             | 106 |                      |                     |                     | 109         |                      |                     |                     |
| 0                          |     | 49 (46%)             | 32 (54%)            | 17 (36%)            |             | 47 (43%)             | 36 (47%)            | 11 (33%)            |
| 1                          |     | 54 (51%)             | 26 (44%)            | 28 (60%)            |             | 59 (54%)             | 39 (51%)            | 20 (61%)            |
| 2                          |     | 3 (2.8%)             | 1 (1.7%)            | 2 (4.3%)            |             | 3 (2.8%)             | 1 (1.3%)            | 2 (6.1%)            |
| <b>ADT duration</b>        | 105 |                      |                     |                     | 108         |                      |                     |                     |
| < 12 months                |     | 48 (46%)             | 25 (43%)            | 23 (49%)            |             | 51 (47%)             | 35 (47%)            | 16 (48%)            |
| ≥ 12 months                |     | 57 (54%)             | 33 (57%)            | 24 (51%)            |             | 57 (53%)             | 40 (53%)            | 17 (52%)            |
| <b>Gleason score</b>       | 103 |                      |                     |                     | 101         |                      |                     |                     |
| ≤ 6                        |     | 9 (8.7%)             | 4 (6.8%)            | 5 (11%)             |             | 15 (15%)             | 10 (14%)            | 5 (16%)             |
| 7                          |     | 25 (24%)             | 11 (19%)            | 14 (32%)            |             | 26 (26%)             | 15 (22%)            | 11 (34%)            |
| ≥ 8                        |     | 69 (67%)             | 44 (75%)            | 25 (57%)            |             | 60 (59%)             | 44 (64%)            | 16 (50%)            |
| <b>Pain</b>                | 98  | 76 (78%)             | 36 (69%)            | 40 (87%)            | 103         | 72 (70%)             | 49 (68%)            | 23 (74%)            |
| <b>Visceral metastases</b> | 106 | 37 (35%)             | 19 (32%)            | 18 (38%)            | 109         | 41 (38%)             | 24 (32%)            | 17 (52%)            |
| <b>PSA [ng/mL]</b>         | 103 | 63 (19, 223)         | 39 (16, 183)        | 120 (26, 249)       | 105         | 61 (12, 162)         | 39 (11, 132)        | 104 (44, 283)       |
| <b>LDH [IU/L]</b>          | 103 | 251 (199, 369)       | 224 (188, 322)      | 311 (236, 407)      | 107         | 243 (202, 353)       | 223 (193, 334)      | 305 (239, 439)      |
| <b>ALP [IU/L]</b>          | 105 | 124 (77, 223)        | 97 (74, 144)        | 173 (108, 549)      | 107         | 129 (86, 237)        | 114 (75, 194)       | 193 (107, 336)      |
| <b>Hemoglobin [g/dL]</b>   | 106 | 123 (110, 134)       | 124 (114, 136)      | 121 (109, 133)      | 107         | 121 (112, 132)       | 126 (115, 135)      | 117 (110, 121)      |
| <b>NLR [unitless]</b>      | 103 | 3.40 (2.35, 5.03)    | 3.40 (2.21, 4.69)   | 3.44 (2.35, 6.00)   | 106         | 3.4 (2.3, 6.1)       | 3.1 (2.1, 5.6)      | 3.8 (3.0, 8.6)      |

<sup>1</sup>n (%); Median (IQR)

**Supplemental Table 4. Baseline characteristics by treatment arm and baseline CTC count.**

| Characteristic             | N   | ARPI                  |                      |                      | Cabazitaxel |                       |                      |                      |
|----------------------------|-----|-----------------------|----------------------|----------------------|-------------|-----------------------|----------------------|----------------------|
|                            |     | Overall               | CTC low<br>(< 2/ml)  | CTC high<br>(≥ 2/ml) | N           | Overall               | CTC low<br>(< 2/ml)  | CTC high<br>(≥ 2/ml) |
|                            |     | N = 117 <sup>1)</sup> | N = 52 <sup>1)</sup> | N = 65 <sup>1)</sup> |             | N = 120 <sup>1)</sup> | N = 65 <sup>1)</sup> | N = 55 <sup>1)</sup> |
| <b>Age at screening</b>    | 117 |                       |                      |                      | 120         |                       |                      |                      |
| < 65 years                 |     | 30 (26%)              | 21 (40%)             | 9 (14%)              |             | 27 (23%)              | 17 (26%)             | 10 (18%)             |
| 65 - 69 years              |     | 24 (21%)              | 8 (15%)              | 16 (25%)             |             | 30 (25%)              | 13 (20%)             | 17 (31%)             |
| 70 - 74 years              |     | 31 (26%)              | 12 (23%)             | 19 (29%)             |             | 21 (18%)              | 10 (15%)             | 11 (20%)             |
| ≥ 75 years                 |     | 32 (27%)              | 11 (21%)             | 21 (32%)             |             | 42 (35%)              | 25 (38%)             | 17 (31%)             |
| <b>ECOG PS</b>             | 117 |                       |                      |                      | 120         |                       |                      |                      |
| 0                          |     | 53 (45%)              | 29 (56%)             | 24 (37%)             |             | 51 (43%)              | 31 (48%)             | 20 (36%)             |
| 1                          |     | 61 (52%)              | 21 (40%)             | 40 (62%)             |             | 66 (55%)              | 33 (51%)             | 33 (60%)             |
| 2                          |     | 3 (2.6%)              | 2 (3.8%)             | 1 (1.5%)             |             | 3 (2.5%)              | 1 (1.5%)             | 2 (3.6%)             |
| <b>ADT duration</b>        | 116 |                       |                      |                      | 119         |                       |                      |                      |
| < 12 months                |     | 54 (47%)              | 25 (48%)             | 29 (45%)             |             | 54 (45%)              | 27 (42%)             | 27 (49%)             |
| ≥ 12 months                |     | 62 (53%)              | 27 (52%)             | 35 (55%)             |             | 65 (55%)              | 37 (58%)             | 28 (51%)             |
| <b>Gleason score</b>       | 112 |                       |                      |                      | 112         |                       |                      |                      |
| ≤ 6                        |     | 9 (8.0%)              | 3 (5.9%)             | 6 (9.8%)             |             | 17 (15%)              | 10 (16%)             | 7 (14%)              |
| 7                          |     | 27 (24%)              | 6 (12%)              | 21 (34%)             |             | 28 (25%)              | 11 (18%)             | 17 (33%)             |
| ≥ 8                        |     | 76 (68%)              | 42 (82%)             | 34 (56%)             |             | 67 (60%)              | 40 (66%)             | 27 (53%)             |
| <b>Pain</b>                | 108 | 83 (77%)              | 35 (73%)             | 48 (80%)             | 113         | 81 (72%)              | 42 (67%)             | 39 (78%)             |
| <b>Visceral metastases</b> | 117 | 40 (34%)              | 16 (31%)             | 24 (37%)             | 120         | 43 (36%)              | 24 (37%)             | 19 (35%)             |
| <b>PSA [ng/mL]</b>         | 114 | 62 (19, 235)          | 36 (12, 198)         | 104 (26, 238)        | 116         | 61 (14, 160)          | 36 (9, 118)          | 95 (30, 243)         |
| <b>LDH [IU/L]</b>          | 112 | 258 (199, 390)        | 239 (195, 335)       | 302 (208, 403)       | 117         | 247 (202, 351)        | 219 (193, 337)       | 266 (214, 397)       |
| <b>ALP [IU/L]</b>          | 114 | 126 (77, 233)         | 98 (72, 161)         | 141 (95, 399)        | 117         | 126 (81, 235)         | 105 (76, 169)        | 176 (95, 288)        |
| <b>Hemoglobin [g/dL]</b>   | 115 | 122 (110, 134)        | 124 (111, 136)       | 120 (110, 130)       | 117         | 121 (113, 131)        | 125 (112, 135)       | 119 (113, 129)       |
| <b>NLR [unitless]</b>      | 112 | 3.39 (2.35, 4.99)     | 3.24 (1.95, 4.56)    | 3.49 (2.57, 5.54)    | 116         | 3.4 (2.3, 5.8)        | 3.0 (1.9, 5.3)       | 3.8 (2.8, 7.4)       |

<sup>1)</sup>n (%); Median (IQR)

**Supplemental Table 5. Multivariable Cox regression models of baseline CTC count and clinical outcomes.**

| Characteristic             | ibPFS<br>(n = 205) |                     |                  | OS<br>(n = 205) |                     |              | Objective response<br>(n = 168) |                     |              | PSA <sub>50</sub> response<br>(n = 190) |                     |              |
|----------------------------|--------------------|---------------------|------------------|-----------------|---------------------|--------------|---------------------------------|---------------------|--------------|-----------------------------------------|---------------------|--------------|
|                            | HR <sup>1</sup>    | 95% CI <sup>1</sup> | p-value          | HR <sup>1</sup> | 95% CI <sup>1</sup> | p-value      | OR <sup>1</sup>                 | 95% CI <sup>1</sup> | p-value      | OR <sup>1</sup>                         | 95% CI <sup>1</sup> | p-value      |
| <b>CTC count</b>           |                    |                     |                  |                 |                     |              |                                 |                     |              |                                         |                     |              |
| Low (< 2/ml)               | —                  | —                   |                  | —               | —                   |              | —                               | —                   |              | —                                       | —                   |              |
| High (≥ 2/ml)              | 1.14               | 0.80, 1.63          | 0.5              | 1.43            | 0.95, 2.13          | 0.083        | 0.86                            | 0.26, 2.81          | 0.8          | 0.56                                    | 0.23, 1.34          | 0.2          |
| <b>Treatment</b>           |                    |                     |                  |                 |                     |              |                                 |                     |              |                                         |                     |              |
| ARPI                       | —                  | —                   |                  | —               | —                   |              | —                               | —                   |              | —                                       | —                   |              |
| CBZ                        | 0.50               | 0.36, 0.70          | <b>&lt;0.001</b> | 0.53            | 0.36, 0.77          | <b>0.001</b> | 3.85                            | 1.23, 14.9          | <b>0.030</b> | 3.21                                    | 1.49, 7.30          | <b>0.004</b> |
| log(PSA)                   | 1.12               | 0.85, 1.48          | 0.4              | 1.68            | 1.21, 2.33          | <b>0.002</b> | 0.52                            | 0.21, 1.20          | 0.14         | 1.26                                    | 0.69, 2.30          | 0.4          |
| log(LDH)                   | 1.70               | 0.71, 4.10          | 0.2              | 2.64            | 1.02, 6.83          | <b>0.045</b> | 0.16                            | 0.00, 4.20          | 0.3          | 0.62                                    | 0.07, 4.90          | 0.7          |
| log(ALP)                   | 0.90               | 0.53, 1.54          | 0.7              | 1.25            | 0.68, 2.32          | 0.5          | 0.37                            | 0.04, 2.82          | 0.4          | 1.38                                    | 0.38, 4.92          | 0.6          |
| Hemoglobin                 | 0.99               | 0.97, 1.00          | <b>0.020</b>     | 0.98            | 0.97, 1.00          | <b>0.035</b> | 1.01                            | 0.97, 1.05          | 0.7          | 1.06                                    | 1.02, 1.09          | <b>0.001</b> |
| log(NLR)                   | 1.58               | 0.84, 2.98          | 0.2              | 2.50            | 1.21, 5.19          | <b>0.014</b> | 1.26                            | 0.16, 8.75          | 0.8          | 1.21                                    | 0.32, 4.40          | 0.8          |
| <b>ECOG PS</b>             |                    |                     |                  |                 |                     |              |                                 |                     |              |                                         |                     |              |
| 0                          | —                  | —                   |                  | —               | —                   |              | —                               | —                   |              | —                                       | —                   |              |
| 1                          | 1.01               | 0.70, 1.45          | >0.9             | 1.17            | 0.78, 1.76          | 0.5          | 1.43                            | 0.50, 4.23          | 0.5          | 1.23                                    | 0.56, 2.75          | 0.6          |
| 2                          | 2.78               | 0.92, 8.36          | 0.069            | 4.47            | 1.21, 16.5          | <b>0.024</b> | 0.00                            |                     | >0.9         | 0.00                                    |                     | >0.9         |
| <b>ADT duration</b>        |                    |                     |                  |                 |                     |              |                                 |                     |              |                                         |                     |              |
| < 12 months                | —                  | —                   |                  | —               | —                   |              | —                               | —                   |              | —                                       | —                   |              |
| ≥ 12 months                | 1.17               | 0.81, 1.68          | 0.4              | 1.09            | 0.73, 1.64          | 0.7          | 0.50                            | 0.15, 1.53          | 0.2          | 0.88                                    | 0.40, 1.96          | 0.8          |
| <b>Age at screening</b>    |                    |                     |                  |                 |                     |              |                                 |                     |              |                                         |                     |              |
| < 65 years                 | —                  | —                   |                  | —               | —                   |              | —                               | —                   |              | —                                       | —                   |              |
| 65 - 69 years              | 0.93               | 0.58, 1.51          | 0.8              | 0.96            | 0.55, 1.66          | 0.9          | 4.99                            | 0.89, 41.7          | 0.090        | 1.20                                    | 0.39, 3.68          | 0.8          |
| 70 - 74 years              | 0.94               | 0.56, 1.57          | 0.8              | 1.48            | 0.84, 2.63          | 0.2          | 3.03                            | 0.46, 27.1          | 0.3          | 0.94                                    | 0.27, 3.17          | >0.9         |
| ≥ 75 years                 | 0.79               | 0.48, 1.30          | 0.4              | 1.13            | 0.64, 1.97          | 0.7          | 3.28                            | 0.55, 28.0          | 0.2          | 1.33                                    | 0.44, 4.07          | 0.6          |
| <b>Gleason score</b>       |                    |                     |                  |                 |                     |              |                                 |                     |              |                                         |                     |              |
| ≤ 6                        | —                  | —                   |                  | —               | —                   |              | —                               | —                   |              | —                                       | —                   |              |
| 7                          | 1.08               | 0.59, 1.97          | 0.8              | 1.26            | 0.59, 2.67          | 0.6          | 0.60                            | 0.11, 3.39          | 0.5          | 0.78                                    | 0.22, 2.85          | 0.7          |
| ≥ 8                        | 1.33               | 0.74, 2.39          | 0.3              | 1.84            | 0.89, 3.82          | 0.10         | 0.75                            | 0.17, 3.66          | 0.7          | 0.59                                    | 0.19, 1.93          | 0.4          |
| <b>Visceral metastases</b> |                    |                     |                  |                 |                     |              |                                 |                     |              |                                         |                     |              |
| No                         | —                  | —                   |                  | —               | —                   |              | —                               | —                   |              | —                                       | —                   |              |
| Yes                        | 1.38               | 0.96, 1.97          | 0.079            | 1.57            | 1.07, 2.31          | <b>0.022</b> | 1.72                            | 0.58, 5.19          | 0.3          | 0.91                                    | 0.40, 2.01          | 0.8          |

**1HR = Hazard Ratio, CI = Confidence Interval, OR = Odds Ratio**

**Supplemental Table 6. Best radiological response by treatment arm and baseline CTC and CTC-CIN count.**

| Group                  | Parameter       | ARPI |                  |                   | CBZ |                  |                   |
|------------------------|-----------------|------|------------------|-------------------|-----|------------------|-------------------|
|                        |                 | N    | Low <sup>1</sup> | High <sup>1</sup> | N   | Low <sup>1</sup> | High <sup>1</sup> |
| Baseline CTC count     |                 | 86   |                  |                   | 104 |                  |                   |
|                        | CR <sup>1</sup> |      | 0 (0%)           | 0 (0%)            |     | 0 (0%)           | 0 (0%)            |
|                        | PR <sup>1</sup> |      | 1 (2%)           | 5 (11%)           |     | 15 (26%)         | 6 (13%)           |
|                        | SD <sup>1</sup> |      | 23 (58%)         | 25 (54%)          |     | 33 (57%)         | 24 (52%)          |
|                        | PD <sup>1</sup> |      | 16 (40%)         | 16 (35%)          |     | 10 (17%)         | 16 (35%)          |
| Baseline CTC-CIN count |                 | 81   |                  |                   | 97  |                  |                   |
|                        | CR <sup>1</sup> |      | 0 (0%)           | 0 (0%)            |     | 0 (0%)           | 0 (0%)            |
|                        | PR <sup>1</sup> |      | 2 (4%)           | 3 (9%)            |     | 16 (23%)         | 4 (14%)           |
|                        | SD <sup>1</sup> |      | 26 (54%)         | 19 (58%)          |     | 42 (61%)         | 9 (32%)           |
|                        | PD <sup>1</sup> |      | 20 (42%)         | 11 (33%)          |     | 11 (16%)         | 15 (54%)          |

<sup>1</sup>n (%); CR = Complete Response; PR = Partial Response; SD = Stable Disease; PD = Progressive Disease

**Supplemental Table 7. Contingency tables for progressive vs non progressive disease as best overall response by treatment arm and baseline CTC and CTC-CIN count.**

| Group        | ARPI            |                     |                 |                     |         | CBZ             |                     |                 |                     |                  |
|--------------|-----------------|---------------------|-----------------|---------------------|---------|-----------------|---------------------|-----------------|---------------------|------------------|
|              | PD <sup>1</sup> | Non-PD <sup>1</sup> | OR <sup>1</sup> | 95% CI <sup>1</sup> | p-value | PD <sup>1</sup> | Non-PD <sup>1</sup> | OR <sup>1</sup> | 95% CI <sup>1</sup> | p-value          |
| CTC low      | 16<br>(40%)     | 24<br>(60%)         | 1.25            | 0.47,<br>3.29       | 0.66    | 10<br>(17%)     | 48<br>(83%)         | 0.39            | 0.14,<br>1.06       | 0.07             |
| CTC high     | 16<br>(35%)     | 30<br>(65%)         |                 |                     |         | 16<br>(35%)     | 30<br>(65%)         |                 |                     |                  |
| CTC-CIN low  | 20<br>(42%)     | 28<br>(58%)         | 1.42            | 0.52,<br>4.03       | 0.49    | 11<br>(16%)     | 58<br>(84%)         | 0.17            | 0.05,<br>0.49       | <b>&lt;0.001</b> |
| CTC-CIN high | 11<br>(33%)     | 22<br>(67%)         |                 |                     |         | 15<br>(54%)     | 13<br>(46%)         |                 |                     |                  |

<sup>1</sup>n (%); PD = Progressive Disease; OR = Odds Ratio; CI = Confidence Interval

**Supplemental Table 8. PSA<sub>50</sub> response rate by treatment arm and baseline CTC and CTC-CIN count.**

| Group                  | Parameter | ARPI (PSA <sub>50</sub> RR, 95% | CBZ (PSA <sub>50</sub> RR, 95% | Overall (PSA <sub>50</sub> RR, 95% |
|------------------------|-----------|---------------------------------|--------------------------------|------------------------------------|
|                        |           | CI) <sup>1,2</sup>              | CI) <sup>1,2</sup>             | CI) <sup>2</sup>                   |
| Baseline CTC count     | Low       | 8/47; 17% (7.6%, 31%)           | 24/57; 42% (29%, 56%)          | 32/104; 31% (22%, 41%)             |
|                        | High      | 6/55; 11% (4.1%, 22%)           | 15/50; 30% (18%, 45%)          | 21/105; 20% (13%, 29%)             |
| Baseline CTC-CIN count | Low       | 8/57; 14% (6.3%, 26%)           | 29/70; 41% (30%, 54%)          | 37/127; 29% (21%, 38%)             |
|                        | High      | 5/40; 13% (4.2%, 27%)           | 6/30; 20% (7.7%, 39%)          | 11/70; 16% (8.1%, 26%)             |

<sup>1</sup>n/No. obs.; %; <sup>2</sup>CI = Confidence Interval

**Supplemental Table 9. Contingency tables for absence vs presence of a PSA<sub>50</sub> reponse by treatment arm and baseline CTC and CTC-CIN count group.**

| Group               | ARPI                                               |                                            |                 |                        |             | CBZ                                                |                                            |                 |                        |             |
|---------------------|----------------------------------------------------|--------------------------------------------|-----------------|------------------------|-------------|----------------------------------------------------|--------------------------------------------|-----------------|------------------------|-------------|
|                     | Non-<br>PSA <sub>50</sub><br>response <sup>1</sup> | PSA <sub>50</sub><br>response <sup>1</sup> | OR <sup>1</sup> | 95%<br>CI <sup>1</sup> | p-<br>value | Non-<br>PSA <sub>50</sub><br>response <sup>1</sup> | PSA <sub>50</sub><br>response <sup>1</sup> | OR <sup>1</sup> | 95%<br>CI <sup>1</sup> | p-<br>value |
| CTC<br>low          | 39 (83%)                                           | 8 (17%)                                    | 0.16,<br>2.16   | 0.47,<br>3.29          | 0.4         | 33 (58%)                                           | 24 (42%)                                   | 0.39            | 0.59                   | 0.23        |
| CTC<br>high         | 49 (89%)                                           | 6 (11%)                                    |                 |                        |             | 35 (70%)                                           | 15 (30%)                                   |                 |                        |             |
| CTC-<br>CIN<br>low  | 49 (86%)                                           | 8 (14%)                                    | 0.21,<br>3.34   | 0.52,<br>4.03          | 1           | 41 (59%)                                           | 29 (41%)                                   | 0.17            | 0.36                   | <b>0.04</b> |
| CTC-<br>CIN<br>high | 35 (87%)                                           | 5 (13%)                                    |                 |                        |             | 24 (80%)                                           | 6 (20%)                                    |                 |                        |             |

<sup>1</sup>n (%); OR = Odds Ratio; CI = Confidence Interval

## CARD trial sites

### a. Austria

- i. Medical University of Vienna, Vienna, Austria
- ii. Ordensklinikum Linz GmbH Elisabethinen, Linz, Austria

### b. Belgium

- i. Erasme Hospital, Brussels, Belgium
- ii. Ghent University Hospital, Ghent, Belgium
- iii. Institut Jules Bordet, Bruxelles, Belgium
- iv. Grand Hôpital de Charleroi, Charleroi, Belgium
- v. AZ Sint-Lucas, Brugge, Belgium
- vi. KU Leuven-University Hospital of Leuven, Leuven, Belgium

### c. Czech Republic

- i. Palacky University Medical School and Teaching Hospital, Olomouc, Czech Republic
- ii. Medical School and University Hospital in Pilsen, Pilsen, Czech Republic
- iii. Masarykuv Onkologický Ústav, Brno, Czech Republic
- iv. Thomayerova Nemocnice, Praha, Czech Republic

### d. France

- i. Jean Godinot Institute, Reims, France
- ii. Foch Hospital, Suresnes, France

- iii. Jean Perrin Center, Clermont Ferrand, France
- iv. Strasbourg University Hospital, Strasbourg, France
- v. Saint Louis Hospital, Paris, France
- vi. J Paolii Calmettes Institute, Marseille, France
- vii. Institut Gustave Roussy and University of Paris Sud, Villejuif, France
- viii. CHU Bretonneau, and University François Rabelais, Tours, France
- ix. Centre Val D Aurelle, Montpellier, France
- x. Centre Léon Bérard, Lyon, France
- xi. ARIO (Centre armoricain de radiologie, imagerie médicale et oncologie), Plerin, France

e. Germany

- i. Studienpraxis Urologie, Nürtingen, Germany
- ii. Urologicum Duisburg, Duisburg, Germany
- iii. University Medical Centre Mannheim, Mannheim, Germany
- iv. Universitaetsklinikum Muenster, Muenster, Germany
- v. Onkologie Aschaffenburg, Aschaffenburg, Germany
- vi. Jena University Hospital, Jena
- vii. Wissenschaftskontor Nord GmbH & Co. KG, Rostock, Germany
- viii. Kliniken Essen-Mitte Evang. Huysens-Stiftung/Knappschaft GmbH,  
Germany
- ix. Aturo-Urologische, Gemeinschaftspraxis, Berlin, Germany

- x. University Hospital Schleswig-Holstein, Campus Lübeck, Lübeck, Germany
- xi. University of Magdeburg, Magdeburg, Germany
- xii. University Medical Center, Göttingen, Germany.
- xiii. Radboud University Nijmegen Medical Center, Nijmegen, The Netherlands.

f. Greece

- i. Alexandra Hospital, National and Kapodistrian University of Athens, Athens, Greece
- ii. Papageorgiou General Hospital of Thessaloniki, Thessaloniki, Greece
- iii. Athens Medical Center, Marousi, Athens, Greece

g. Iceland

- i. Landspítali University Hospital, Reykjavik, Iceland

h. Ireland

- i. Mater Misericordiae University Hospital, Ireland
- ii. Adelaide and Meath Hospital Tallaght, Dublin, Ireland

i. Italy

- i. Azienda Ospedaliera Universitaria Integrata (AOUI), Verona & Policlinico Universitario Agostino Gemelli IRCCS, Rome, Italy
- ii. Azienda Ospedaliera San Camillo Forlanini, Rome, Italy
- iii. Istituto Nazionale Tumori-IRCCS-Fondazione G. Pascale, Naples, Italy
- iv. Azienda Ospedaliero Universitaria Di Parma, Parma, Italy

- v. Institute for Cancer Research and Treatment of Candiolo, Candiolo, Italy
- vi. Brescia Civil Hospital, Brescia, Italy
- vii. University Hospital of Pisa, Pisa, Italy
- j. Norway
  - i. Østfold Hospital Trust, Grålum, Norway
  - ii. Trondheim University Hospital, Trondheim, Norway
- k. Spain
  - i. Hospital Universitario 12 de Octubre, Madrid, Spain
  - ii. Vall d'Hebron University Hospital, Barcelona, Spain
  - iii. Hospital Universitario Virgen Del Rocio, Sevilla, Spain
  - iv. Hospital la Paz, Castellana, Spain
- l. The Netherlands
  - i. Erasmus Medical Center, Rotterdam, The Netherlands
  - ii. Zuyderland Medisch Centrum, Sittard-Geleen, The Netherlands
  - iii. Amphia Hospital, Breda, The Netherlands
- m. United Kingdom
  - i. The Institute of Cancer Research and the Royal Marsden Hospital, London, United Kingdom
